# Supplementary material
Source: Springer Nature journal article supplement (https://www.springermedizin.de/resource/supplementary/13075_2009_2737_MOESM8_ESM.pdf/9692774)

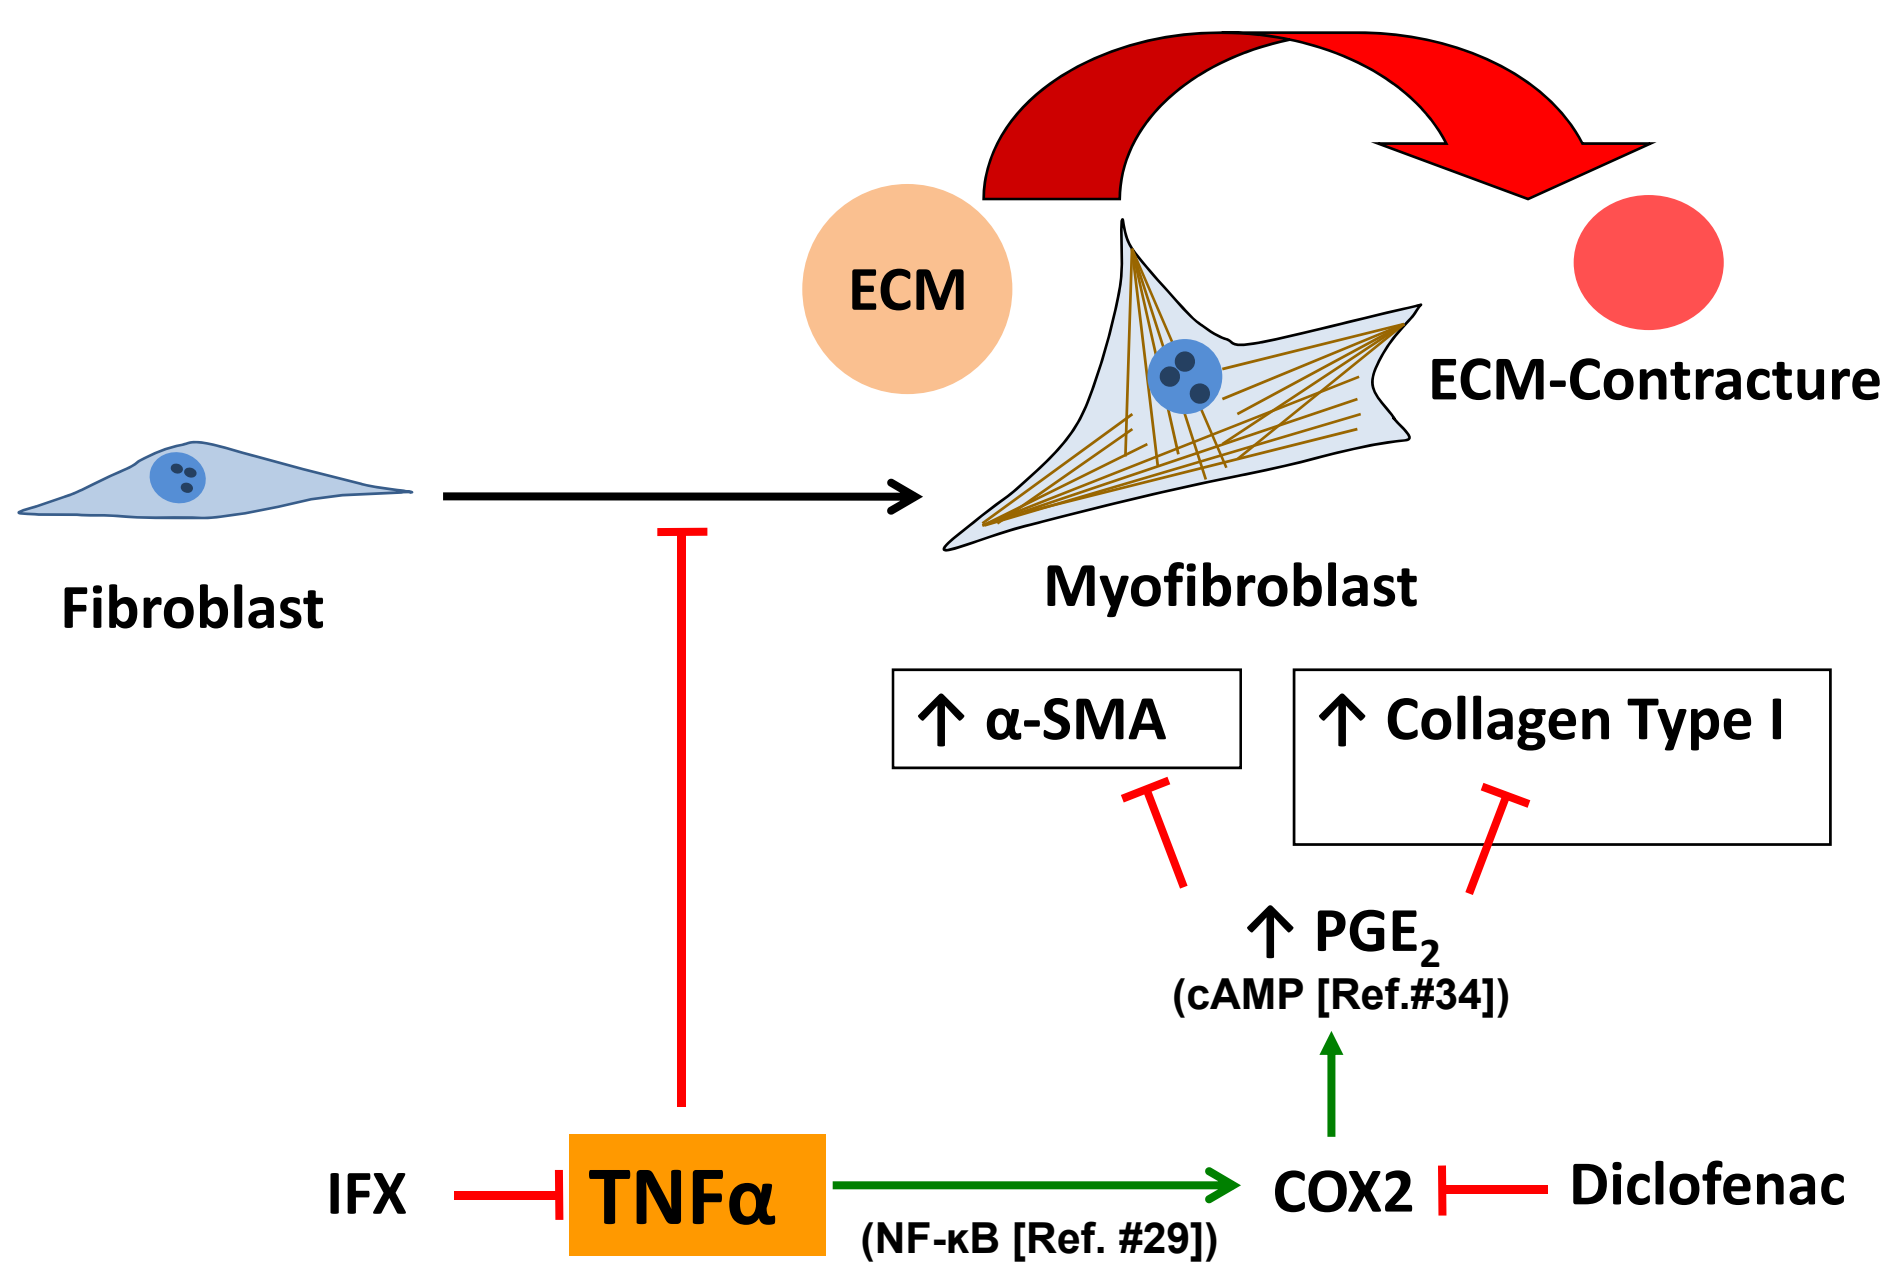

Supplement: MOESM8 [file 9692774]
